# Supplementary material
Source: HighWire-hosted journal article supplement (https://www.rcpjournals.org/highwire/filestream/11640/field_highwire_adjunct_files/0/Roycroft_Supplementary_material_S1.pdf)
Supplement: Roycroft_Supplementary_material_S1.pdf [file Roycroft_Supplementary_material_S1.pdf]

S1 – Approximate number of times each trainee works beyond rostered hours per quarter from NTS 2018 data

| Trust | Q: In this post, how often (if at all) have you worked beyond your rostered hours |           |            |             |                       |           | Approximate number of times each trainee works beyond rostered hours per quarter |
|-------|-----------------------------------------------------------------------------------|-----------|------------|-------------|-----------------------|-----------|----------------------------------------------------------------------------------|
|       | n=                                                                                | Daily (%) | Weekly (%) | Monthly (%) | Less than Monthly (%) | Never (%) |                                                                                  |
| A     | 163                                                                               | 7.93      | 33.5       | 26.8        | 24.4                  | 7.32      | <b>9.10</b>                                                                      |
| B     | 293                                                                               | 9.56      | 34.8       | 26.3        | 18.4                  | 10.9      | <b>10.1</b>                                                                      |
| C     | 373                                                                               | 14.0      | 42.7       | 18.8        | 18.3                  | 6.18      | <b>13.1</b>                                                                      |
| D     | 98                                                                                | 5.10      | 42.96      | 22.5        | 18.4                  | 11.2      | <b>8.38</b>                                                                      |
| E     | 253                                                                               | 11.4      | 44.5       | 19.3        | 17.3                  | 7.48      | <b>11.9</b>                                                                      |
| F     | 178                                                                               | 14.6      | 42.7       | 21.9        | 15.2                  | 5.62      | <b>13.5</b>                                                                      |
| G     | 834                                                                               | 12.5      | 42.0       | 20.8        | 18.6                  | 6.13      | <b>12.3</b>                                                                      |
| H     | 438                                                                               | 16.7      | 43.6       | 17.4        | 17.0                  | 5.28      | <b>14.7</b>                                                                      |
| I     | 218                                                                               | 8.68      | 32.0       | 21.0        | 23.7                  | 14.6      | <b>9.16</b>                                                                      |
| J     | 168                                                                               | 10.8      | 44.3       | 18.6        | 18.0                  | 8.38      | <b>11.5</b>                                                                      |
| K     | 88                                                                                | 5.68      | 37.5       | 19.3        | 29.6                  | 7.95      | <b>8.12</b>                                                                      |
| L     | 148                                                                               | 6.71      | 32.9       | 28.9        | 20.1                  | 11.4      | <b>8.38</b>                                                                      |
| M     | 428                                                                               | 16.3      | 44.0       | 18.6        | 17.0                  | 4.19      | <b>14.5</b>                                                                      |
| N     | 718                                                                               | 12.2      | 42.0       | 20.9        | 19.8                  | 5.15      | <b>12.2</b>                                                                      |
| O     | 103                                                                               | 29.4      | 37.3       | 15.7        | 10.8                  | 6.86      | <b>20.9</b>                                                                      |
| P     | 413                                                                               | 19.1      | 40.7       | 22.0        | 12.4                  | 5.81      | <b>15.8</b>                                                                      |
| Q     | 323                                                                               | 12.4      | 43.5       | 19.4        | 18.2                  | 6.48      | <b>12.3</b>                                                                      |
| R     | 58                                                                                | 8.62      | 39.7       | 24.1        | 20.7                  | 6.90      | <b>10.0</b>                                                                      |
| S     | 703                                                                               | 12.0      | 45.0       | 18.5        | 17.6                  | 6.97      | <b>12.2</b>                                                                      |
| T     | 248                                                                               | 10.0      | 45.2       | 22.0        | 16.0                  | 6.80      | <b>11.3</b>                                                                      |
| U     | 98                                                                                | 4.08      | 29.6       | 19.4        | 27.6                  | 19.4      | <b>6.36</b>                                                                      |
| V     | 58                                                                                | 13.8      | 39.7       | 20.7        | 19.0                  | 6.90      | <b>12.8</b>                                                                      |
| W     | 358                                                                               | 9.78      | 43.0       | 21.0        | 16.5                  | 9.78      | <b>10.9</b>                                                                      |
| X     | 318                                                                               | 13.2      | 38.2       | 18.8        | 21.6                  | 8.15      | <b>12.2</b>                                                                      |
| Y     | 593                                                                               | 13.7      | 42.5       | 18.9        | 18.2                  | 6.75      | <b>12.9</b>                                                                      |
| Z     | 103                                                                               | 10.5      | 35.2       | 22.9        | 23.8                  | 7.62      | <b>10.6</b>                                                                      |
